# Supplementary material for: Performance Comparison between the Specific and Baseline Prediction Models of Ecotoxicity for Pharmaceuticals: Is a Specific QSAR Model Inevitable?
Source: Hindawi journal article supplement (doi:10.1155/2021/5563066), 2021-10-31
Supplement: f1 [file 5563066.f1.pdf]

**Journal of Chemistry**

**Performance comparison between the specific and baseline prediction models of ecotoxicity for pharmaceuticals: Is a specific QSAR model inevitable?**

Qingwei Bu\*, Qingshan Li, Yun Liu, Chun Cai

School of Chemical & Environmental Engineering, China University of Mining & Technology-Beijing, Beijing 100083, P.R. China.

Correspondence should be addressed to Qingwei Bu; [qingwei.bu@cumtb.edu.cn](mailto:qingwei.bu@cumtb.edu.cn)

Table S1: The measured (the lowest observed value) and predicted toxicity data for pharmaceuticals used for performance comparison of Sangion model versus ECOSAR.

| CASRN        | Pharmaceutical        | Test Species         | EC50 or LC50, µg/L |              |                  | hat value (hii) |
|--------------|-----------------------|----------------------|--------------------|--------------|------------------|-----------------|
|              |                       |                      | Measured           | Predicted    |                  |                 |
|              |                       |                      |                    | ECOSAR       | Sangion model    |                 |
| 50022        | Dexamethasone         | Daphnia magna        | 48300              | 317869       | 41851            | 0.0208          |
| 50066        | Phenobarbital         | Daphnia magna        | 1463106            | 406923       | 29190            | 0.0264          |
| 50248        | Prednisolone          | Daphnia magna        | 85000              | 550110       | 41414            | 0.0267          |
| 50657        | Niclosamide           | Daphnia magna        | 1.6                | 974          | 15202            | 0.0426          |
| 55630        | Nitroglycerin         | Daphnia magna        | 46000              | 277449       | 434599           | 0.0469          |
| <b>57921</b> | <b>Streptomycin</b>   | <b>Daphnia magna</b> | <b>650000</b>      | <b>4E+13</b> | <b>108845245</b> | <b>0.3304</b>   |
| 60004        | Edathamil             | Daphnia magna        | 113000             | 1E+10        | 1693736          | 0.0751          |
| 60548        | Tetracycline          | Daphnia magna        | 340000             | 1E+8         | 460376           | 0.1281          |
| 65850        | Benzoic acid          | Daphnia magna        | 140000             | 6E+8         | 31996            | 0.0539          |
| 69534        | Ampicillin            | Daphnia magna        | 1000000            | 479481       | 377604           | 0.0425          |
| 103902       | 4-Acetamidophenol     | Daphnia magna        | 4800               | 2157158      | 28645            | 0.0414          |
| 108189       | Diisopropylammonium   | Daphnia magna        | 187000             | 95217        | 18141            | 0.0353          |
| 109897       | N-Ethylethanamine     | Daphnia magna        | 164000             | 358354       | 11546            | 0.0353          |
| 138863       | Cinene                | Daphnia magna        | 28200              | 238          | 2675             | 0.0251          |
| 154212       | Lincomycin            | Daphnia magna        | 23180              | 5577733      | 1044017          | 0.0454          |
| 443481       | Metronidazole         | Daphnia magna        | 211000             | 4174426      | 13004            | 0.0553          |
| 657249       | 1,1-Dimethylbiguanide | Daphnia magna        | 64000              | 6E+8         | 211666           | 0.0771          |
| 15307865     | Diclofenac            | Daphnia magna        | 67000              | 41414        | 11317            | 0.0783          |
| 15687271     | Ibuprofen             | Daphnia magna        | 34100              | 27848        | 25425            | 0.0412          |
| 22204531     | Naproxen              | Daphnia magna        | 174000             | 121546       | 10383            | 0.0590          |
| 26787780     | Amoxicillin           | Daphnia magna        | 1000000            | 1294875      | 489531           | 0.0475          |

| CASRN         | Pharmaceutical             | Test Species                           | EC50 or LC50, µg/L |                |               | hat value (hii) |
|---------------|----------------------------|----------------------------------------|--------------------|----------------|---------------|-----------------|
|               |                            |                                        | Measured           | Predicted      |               |                 |
|               |                            |                                        |                    | ECOSAR         | Sangion model |                 |
| 49562289      | Fenofibrate                | Daphnia magna                          | 50120              | 307            | 8356          | 0.0408          |
| 62571862      | Captopril                  | Daphnia magna                          | 100000             | 1007920        | 212734        | 0.0414          |
| 65277421      | Ketoconazole               | Daphnia magna                          | 1510               | 1977           | 10408         | 0.0382          |
| 81103119      | Clarithromycin             | Daphnia magna                          | 25720              | 34065          | 160613        | 0.0380          |
| 85721331      | Ciprofloxacin              | Daphnia magna                          | 1100               | 8049567        | 77016         | 0.0345          |
| 117704253     | Doramectin                 | Daphnia magna                          | 0.0637             | 668            | 10172         | 0.0614          |
| 107153        | Ethylenediammonium         | Pimephales promelas                    | 115700             | 87731734       | 2399244       | 0.0845          |
| 109897        | N-Ethylethanamine          | Pimephales promelas                    | 855000             | 704446         | 264332        | 0.0677          |
| 138863        | Cinene                     | Pimephales promelas                    | 38500              | 323            | 22667         | 0.0366          |
| 552410        | Paeonol                    | Pimephales promelas                    | 54900              | 122773         | 3323          | 0.0454          |
| <b>55630</b>  | <b>Nitroglycerin</b>       | <b>Pseudokirchneriella subcapitata</b> | <b>400</b>         | <b>171582</b>  | <b>0.02</b>   | <b>3.6987</b>   |
| 58082         | Caffeine                   | Pseudokirchneriella subcapitata        | 150000             | 1274314        | 9035          | 0.0924          |
| 65850         | Benzoic acid               | Pseudokirchneriella subcapitata        | 140000             | 518374         | 31996         | 0.0728          |
| <b>107153</b> | <b>Ethylenediammonium</b>  | <b>Pseudokirchneriella subcapitata</b> | <b>151000</b>      | <b>6674644</b> | <b>6990</b>   | <b>0.5078</b>   |
| <b>108189</b> | <b>Diisopropylammonium</b> | <b>Pseudokirchneriella subcapitata</b> | <b>20000</b>       | <b>61933</b>   | <b>55</b>     | <b>1.3958</b>   |
| <b>109897</b> | <b>N-Ethylethanamine</b>   | <b>Pseudokirchneriella subcapitata</b> | <b>20000</b>       | <b>169451</b>  | <b>157</b>    | <b>0.9826</b>   |
| 128461        | Dihydrostreptomycin        | Pseudokirchneriella subcapitata        | 107                | 8E+11          | 318           | 0.1938          |
| 138863        | Cinene                     | Pseudokirchneriella subcapitata        | 38500              | 522            | 22667         | 0.1009          |
| 15307865      | Diclofenac                 | Pseudokirchneriella subcapitata        | 64800              | 41414          | 1939          | 0.0347          |
| 100986854     | Levofloxacin               | Pseudokirchneriella subcapitata        | 7400               | 4183702        | 6985          | 0.0580          |

CASRN, Chemical Abstract Service register number.

EC50, effect concentration for half tested species.

LC50, half lethal concentration.

Hat value ( $\hat{h}_{ii}$ ) denotes that the leverage used to determine if a chemical is in the applicability domain of the QSAR specific model. The bold entries indicate those out of the model AD.

Table S2: The measured (the lowest observed value) and predicted toxicity data for pharmaceuticals used for performance comparison of Tugcu model versus ECOSAR.

| CASRN  | Pharmaceutical      | Test Species | LC50, µg/L |           |             | hat value (hii) |
|--------|---------------------|--------------|------------|-----------|-------------|-----------------|
|        |                     |              | Measured   | Predicted |             |                 |
|        |                     |              |            | ECOSAR    | Tugcu model |                 |
| 50180  | Cyclophosphamide    | Fish         | 2193148    | 1791429   | 7011        | 0.0912          |
| 50533  | Chlorpromazine      | Fish         | 9566       | 347       | 2098        | 0.0923          |
| 50657  | Niclosamide         | Fish         | 26         | 1355      | 5121        | 0.0776          |
| 53861  | Indometacin         | Fish         | 81920      | 2939      | 34758       | 0.0874          |
| 55630  | Nitroglycerin       | Fish         | 1380       | 511126    | 21568       | 0.1655          |
| 57625  | Chlortetracycline   | Fish         | 78900      | 1E+8      | 107598      | 0.1403          |
| 57636  | Ethinyl estradiol   | Fish         | 0.0012     | 3063      | 995         | 0.1053          |
| 57681  | Sulfamethazine      | Fish         | 100000     | 2989437   | 80526       | 0.1647          |
| 57921  | Streptomycin        | Fish         | 180000     | 1.7E+14   | 180         | 0.3355          |
| 58731  | Diphenhydramine     | Fish         | 51072      | 21291     | 11391       | 0.1023          |
| 60333  | Linoleic acid       | Fish         | 12000      | 26        | 1670        | 0.2497          |
| 61687  | Mefenamic acid      | Fish         | 8040       | 2253      | 7483        | 0.0730          |
| 65850  | Benzoic acid        | Fish         | 100000     | 1300781   | 19204       | 0.1648          |
| 67458  | furazolidone        | Fish         | 25000      | 1411133   | 16749       | 0.1925          |
| 79572  | oxytetracycline     | Fish         | 110100     | 8.8E+9    | 64526       | 0.1416          |
| 94097  | Benzocaine          | Fish         | 7200       | 206238    | 81278       | 0.0439          |
| 103902 | 4-Acetamidophenol   | Fish         | 160000     | 4457745   | 180214      | 0.0562          |
| 107153 | Ethylenediammonium  | Fish         | 115700     | 87731734  | 21690       | 0.1170          |
| 108189 | Diisopropylammonium | Fish         | 37000      | 173283    | 93544       | 0.1282          |
| 108736 | Phloroglucinol      | Fish         | 10824864   | 2067516   | 12333       | 0.2642          |
| 109897 | N-Ethylethanamine   | Fish         | 25000      | 704446    | 51989       | 0.0992          |

| CASRN           | Pharmaceutical        | Test Species | LC50, µg/L    |                |                | hat value (hii) |
|-----------------|-----------------------|--------------|---------------|----------------|----------------|-----------------|
|                 |                       |              | Measured      | Predicted      |                |                 |
|                 |                       |              |               | ECOSAR         | Tugcu model    |                 |
| 127071          | Hydroxyurea           | Fish         | 3239943       | 1.3E+8         | 5607           | 0.1110          |
| 138863          | Cinene                | Fish         | 34000         | 323            | 725            | 0.2305          |
| 552410          | Paeonol               | Fish         | 54900         | 122773         | 23932          | 0.0818          |
| 738705          | Trimethoprim          | Fish         | 100000        | 3304140        | 1132           | 0.2855          |
| 768945          | Amantadine            | Fish         | 25000         | 51234          | 14158          | 0.1028          |
| 3778732         | Isophosphamide        | Fish         | 835485        | 1791429        | 9183           | 0.0960          |
| 14769734        | Levamisole            | Fish         | 250000        | 27955          | 14860          | 0.0584          |
| 17902237        | Tegafur               | Fish         | 6065121       | 10745844       | 113668         | 0.0751          |
| 25812300        | Gemfibrozil           | Fish         | 851           | 6728           | 5315           | 0.0959          |
| 26787780        | Amoxicillin           | Fish         | 132400        | 2507185        | 435045         | 0.2424          |
| 33125972        | Etomidate             | Fish         | 280           | 22526          | 34548          | 0.0432          |
| 51384511        | Metoprolol            | Fish         | 100000        | 413299         | 9921           | 0.0866          |
| 51481619        | Cimetidine            | Fish         | 100000        | 3956174        | 26743          | 0.1343          |
| 55268741        | Praziquantel          | Fish         | 13400         | 106814         | 230113         | 0.1060          |
| 73590586        | Omeprazole            | Fish         | 31088         | 15777          | 12941          | 0.1898          |
| 79617962        | Sertraline            | Fish         | 191           | 281            | 78             | 0.3313          |
| 79902639        | Simvastatin           | Fish         | 2680          | 467            | 6758           | 0.2161          |
| 86386734        | Fluconazole           | Fish         | 100000        | 9310569        | 3360           | 0.1127          |
| 100986854       | Levofloxacin          | Fish         | 100000        | 28067232       | 56494          | 0.0624          |
| <b>60004</b>    | <b>Edathamil</b>      | <b>Fish</b>  | <b>41000</b>  | <b>4.4E+10</b> | <b>2600301</b> | <b>0.3957</b>   |
| <b>81103119</b> | <b>Clarithromycin</b> | <b>Fish</b>  | <b>100000</b> | <b>53813</b>   | <b>6808661</b> | <b>1.7992</b>   |
| <b>114078</b>   | <b>Erythromycin</b>   | <b>Fish</b>  | <b>349000</b> | <b>224235</b>  | <b>586991</b>  | <b>0.5641</b>   |

CASRN, Chemical Abstract Service register number.

LC50, half lethal concentration.

Hat value ( $\hat{h}_{ii}$ ) denotes that the leverage used to determine if a chemical is in the applicability domain (AD) of the QSAR specific model. The bold entries indicate those out of the model AD.

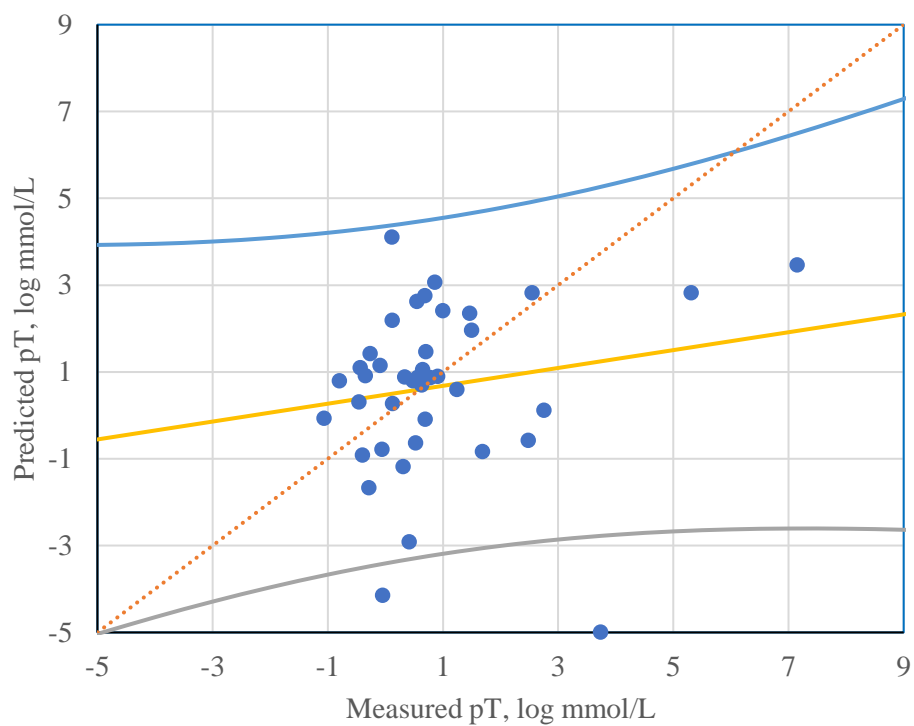

Figure S1: Measured toxicity versus the lowest model prediction of ECOSAR for pharmaceuticals used for performance comparison of Sangion modle versus ECOSAR. The best-fit linear regression and 95% prediction intervals are shown.



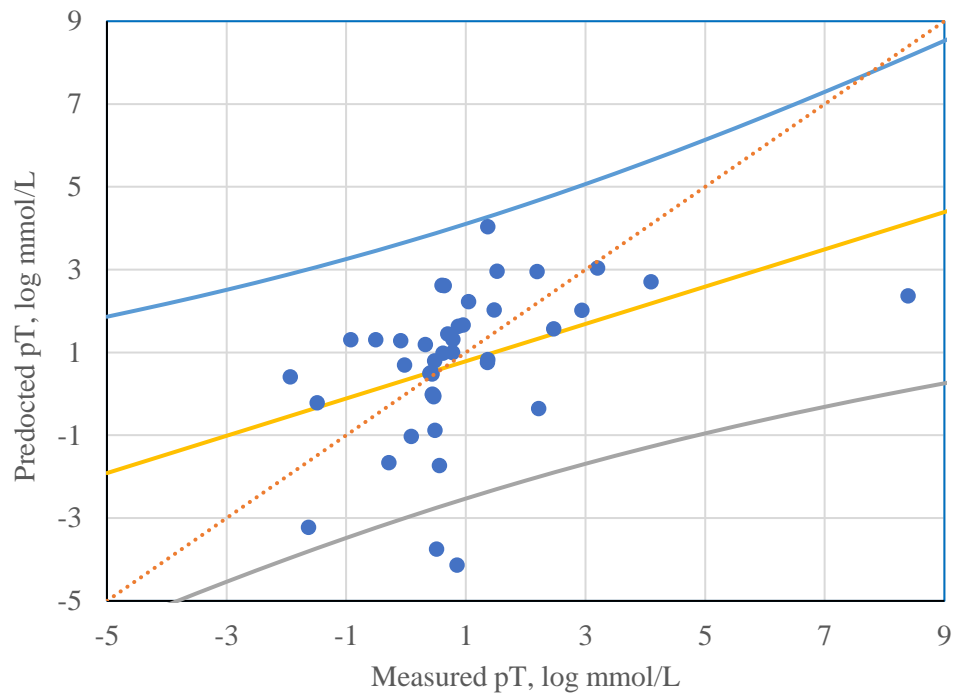

Figure S2: Measured toxicity versus the lowest model prediction of ECOSAR for pharmaceuticals used for performance comparison of Tugcu modle versus ECOSAR. The best-fit linear regression and 95% prediction intervals are shown.
